# Supplementary material for: LprG-Mediated Surface Expression of Lipoarabinomannan Is Essential for Virulence of Mycobacterium tuberculosis
Source: PubMed Central journal article supplement (PMC4169494; doi:10.1371/journal.ppat.1004376), 2014-09-18
Supplement: ppat.1004376.s010.pdf [file ppat.1004376.s010.pdf]

Table S5. Primers used in this study.

| Primer Name                       | Forward Primer                            | Reverse Primer                            |
|-----------------------------------|-------------------------------------------|-------------------------------------------|
| <b>Allelic Exchange Substrate</b> |                                           |                                           |
| <i>lprG</i>                       |                                           |                                           |
| 5' AES                            | 5'- <u>cttaaggtgtg</u> ccgatccacaatggg-3' | 5'- <u>tctaga</u> acagtgggcgcgatgctaac-3' |
| 3' AES                            | 5'- <u>aagctt</u> gggcgagaaggtccaggtca-3' | 5'- <u>actagt</u> atcagccgggtgcgagcgaa-3' |
| <b>Complementation</b>            |                                           |                                           |
| <i>lprG</i> -Rv1410c operon-5'    | 5'- <u>tctagaggtt</u> gaccggttcaggt-3'    | 5'- <u>ccatgg</u> cgatcgcggtcaac-3'       |
| <i>lprG</i> -Rv1410c operon-3'    | 5'- <u>ccatgg</u> taatgatccacttc-3'       | 5'- <u>aagctt</u> aaggtcggaccggatctgtt-3' |
| <b>RT-PCR</b>                     |                                           |                                           |
| <i>lprG</i>                       |                                           |                                           |
| RT                                |                                           | 5'-ctatctggttcaccgcctgt-3'                |
| PCR                               | 5'-cctgtacgccaccctgac-3'                  | 5'-gttctggcgttgatggtat-3'                 |
| <b>Rv1410c</b>                    |                                           |                                           |
| RT                                |                                           | 5'-acaatccgaggatggtgtgc-3'                |
| PCR                               | 5'-tggtgatgtcgagctgttc-3'                 | 5'-agtaaccgtacgccgaata-3'                 |

Restriction endonuclease sites are underlined  
 RT, reverse transcriptase
